# Supplementary material for: Bipolar phenanthroimidazole–diazacarbazole hybrids with appropriate bandgaps for highly efficient and low roll-off red, green and blue electroluminescent devices
Source: Royal Society of Chemistry journal article supplement (doi:10.1039/c6tc02683d), 2016-01-01
Supplement: c6tc02683d1.pdf [file c6tc02683d1.pdf]

## Bipolar phenanthroimidazole-diazacarbazole hybrids with appropriate bandgap for highly efficient and low roll-off red, green and blue electroluminescent devices

Bo Wang, Xialei Lv, Jianghong Tan, Qing Zhang, Zhi Huang, Wei Yi, Lei Wang\*

†Wuhan National Laboratory for Optoelectronics, Huazhong University of Science and Technology, Wuhan, 430074, P. R. China

Corresponding author Prof. Lei Wang, E-mail address: [wanglei@mail.hust.edu.cn](mailto:wanglei@mail.hust.edu.cn);  
Tel: +86-27-65026086

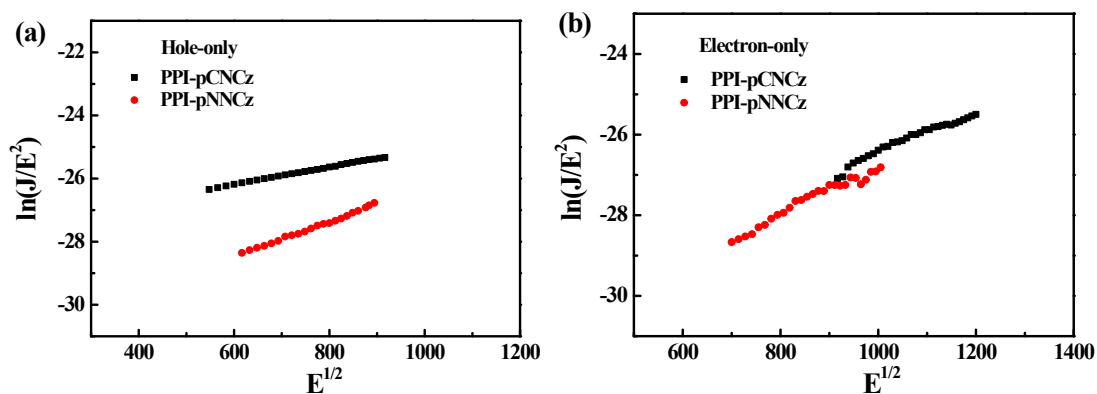

**Figure S1.** (a) The  $\ln(J/E^2)$ - $E^{1/2}$  characteristics of the hole-only devices: ITO/MoO<sub>3</sub> (10 nm)/compounds (80 nm)/MoO<sub>3</sub> (10 nm)/Al. (b) The  $\ln(J/E^2)$ - $E^{1/2}$  characteristics of the electron-only devices: ITO/BCP (10 nm)/compounds (80 nm)/BCP (10 nm)/LiF (1 nm)/Al.

**Table S2.** Key characteristics summary of the PPI-pCNCz and the PPI-pNNCz-based devices and recent reported high performance undoped deep-blue fluorescent devices.

| Host                 | Dopant | $V_{on}$<br>(V) | CE (cd/A) <sup>a</sup> | PE<br>(lm/W) <sup>b</sup> | EQE<br>(%) <sup>c</sup> | CIE (x, y) <sup>d</sup> | Reference |
|----------------------|--------|-----------------|------------------------|---------------------------|-------------------------|-------------------------|-----------|
| PPI-pCNCz            | --     | 3.0             | 1.63, 1.33, 1.54       | 1.17, 0.99, 0.81          | 2.15, 1.75, 2.01        | (0.15, 0.08)            | This work |
| PPI-pNNCz            | --     | 3.3             | 1.69, 1.46, 1.63       | 1.14, 0.85, 0.71          | 2.97, 2.49, 2.76        | (0.15, 0.06)            | This work |
| Be(PPI) <sub>2</sub> | --     | 3.2             | 2.41, 2.18, 2.04       | 2.52, 1.60, 0.95          | 2.82, 2.55, 2.40        | (0.15,0.09)             | Ref 9     |
| Zn(PPI) <sub>2</sub> | --     | 3.2             | 2.06, 1.31, 0.74       | 2.02, 0.75, 0.26          | 2.08, 1.32, 0.75        | (0.15,0.09)             | Ref 9     |
| PPI-F-TPA            | --     | 4.2             | 1.35, --, 1.26         | 1.0, --, 0.5              | 3.11, --, 2.5           | (0.16, 0.05)            | Ref 22    |
| DPO-PPI              | --     | 3.4             | 1.51, 1.36, 1.01       | 1.29, 0.76, 0.38          | 1.88, 1.32, 0.79        | (0.16, 0.09)            | Ref 21    |
| DPO-2PPI             | --     | 3.4             | 1.75, 1.21, 0.71       | 1.53, 0.67, 0.26          | 2.24, 1.92, 1.42        | (0.16, 0.08)            | Ref 21    |

<sup>a</sup> Current efficiency. <sup>b</sup> Power efficiency. <sup>c</sup> External quantum efficiency corresponding to the value at the maximum, 100 and 1000 cd m<sup>-2</sup>. <sup>d</sup> The CIE1931 coordinates of these OLEDs.

**Table S3.** Key characteristics summary of the PPI-pCNCz and the PPI-pNNCz-based devices and recent reported high performance green phosphorescent devices.

| Host                 | Dopant               | $V_{on}$<br>(V) | CE (cd/A) <sup>a</sup> | PE<br>(lm/W) <sup>b</sup> | EQE<br>(%) <sup>c</sup> | CIE (x, y) <sup>d</sup> | Reference |
|----------------------|----------------------|-----------------|------------------------|---------------------------|-------------------------|-------------------------|-----------|
| PPI-pCNCz            | Ir(ppy) <sub>3</sub> | 2.6             | 69.8, 68.8, 65.0       | 81.2, 65.5, 45.3          | 20.2, 19.8, 18.7        | (0.27, 0.63)            | This work |
| PPI-pNNCz            | Ir(ppy) <sub>3</sub> | 2.7             | 79.8, 78.8, 74.6       | 88.3, 68.7, 45.9          | 22.6, 22.3, 21.1        | (0.28, 0.63)            | This work |
| Be(PPI) <sub>2</sub> | Ir(ppy) <sub>3</sub> | 2.7             | 55.6, 54.9, 53.5       | 61.4, 48.8, 36.1          | 15.3, 15.2, 14.7        | (0.32,0.61)             | Ref 9     |
| Zn(PPI) <sub>2</sub> | Ir(ppy) <sub>3</sub> | 2.7             | 58.0, 53.2, 50.7       | 67.5, 49.1, 35.8          | 15.9, 14.6, 13.9        | (0.30,0.63)             | Ref 9     |
| Si(PPI) <sub>2</sub> | Ir(ppy) <sub>3</sub> | 3.4             | --, --, --             | 51.1, 41.6, 26.5          | 19.2, 19.1, 17.8        | (0.32, 0.61)            | Ref 16    |
| m-DPPI               | Ir(ppy) <sub>3</sub> | 2.7             | 58.5, 57.9, 54.6       | 67.1, 60.4, 41.5          | 15.5, 15.4, 14.6        | (0.32, 0.61)            | Ref 17    |
| m-PPPI               | Ir(ppy) <sub>3</sub> | 2.7             | 50.7, 47.5, 43.2       | 58.9, 44.0, 29.4          | 13.5, 12.8, 11.5        | (0.30, 0.63)            | Ref 17    |
| PPI-F-TPA            | Ir(ppy) <sub>3</sub> | 2.7             | 57, --, 49.5           | 60, --, 37.5              | 15.6, --, 13.9          | (0.34, 0.62)            | Ref 22    |
| DPO-PPI              | Ir(ppy) <sub>3</sub> | 2.6             | 62.6, 61.6, 59.3       | 70.2, 61.4, 49.6          | 17.2, 17.1, 16.4        | (0.32, 0.61)            | Ref 21    |
| DPO-2PPI             | Ir(ppy) <sub>3</sub> | 2.6             | 65.4, 63.9, 61.8       | 73.3, 64.7, 52.2          | 18.0, 17.5, 16.9        | (0.30, 0.63)            | Ref 21    |
| m-BPPI               | Ir(ppy) <sub>3</sub> | 2.6             | 66.3, --, 66.1         | 63.1, --, 55.0            | 18.2, --, 18.1          | (0.32, 0.61)            | Ref 22    |

<sup>a</sup> Current efficiency. <sup>b</sup> Power efficiency. <sup>c</sup> External quantum efficiency corresponding to the value at the maximum, 100 and 1000 cd m<sup>-2</sup>. <sup>d</sup> The CIE1931 coordinates of these OLEDs.

**Table S4.** Key characteristics summary of the PPI-pCNCz and the PPI-pNNCz-based devices and recent reported high performance red phosphorescent devices.

| Host                 | Dopant                         | $V_{on}$<br>(V) | CE (cd/A) <sup>a</sup> | PE<br>(lm/W) <sup>b</sup> | EQE<br>(%) <sup>c</sup> | CIE (x, y) <sup>d</sup> | Reference |
|----------------------|--------------------------------|-----------------|------------------------|---------------------------|-------------------------|-------------------------|-----------|
| PPI-pCNCz            | Ir(MDQ)<br><sub>2</sub> (acac) | 3.0             | 19.2, 19.1, 18.1       | 19.3, 11.7, 7.28          | 16.3, 16.1, 14.9        | (0.64, 0.36)            | This work |
| PPI-pNNCz            | Ir(MDQ)<br><sub>2</sub> (acac) | 3.3             | 24.7, 24.6, 23.6       | 22.5, 15.1, 9.16          | 19.3, 19.1, 18.1        | (0.63, 0.36)            | This work |
| Be(PPI) <sub>2</sub> | Ir(MDQ)<br><sub>2</sub> (acac) | 2.3             | 15.9, 15.4, 13.9       | 19.9, 17.5, 12.6          | 15.1, 14.7, 13.3        | (0.64, 0.36)            | Ref 9     |
| Zn(PPI) <sub>2</sub> | Ir(MDQ)<br><sub>2</sub> (acac) | 2.3             | 15.9, 11.3, 10.7       | 21.7, 8.48, 4.83          | 15.2, 10.8, 10.2        | (0.64, 0.36)            | Ref 9     |
| Si(PPI) <sub>2</sub> | (bt) <sub>2</sub><br>Ir(dipba) | 3.3             | --, --, --             | 15.6, 7.5, 3.3            | 12.0, 10.6, 7.3         | (0.64, 0.36)            | Ref 16    |
| m-DPPI               | Ir(MDQ)<br><sub>2</sub> (acac) | 2.3             | 19.7, 17.1, 16.6       | 26.9, 17.8, 12.0          | 11.6, 11.2, 10.5        | 0.64, 0.36              | Ref 17    |
| m-PPPI               | Ir(MDQ)<br><sub>2</sub> (acac) | 2.3             | 14.6, 14.3, 13.2       | 16.8, 11.4, 7.02          | 12.8, 12.6, 10.8        | 0.64, 0.36              | Ref 17    |
| DPO-PPI              | (bt) <sub>2</sub><br>Ir(dipba) | 2.6             | 17.9, 16.2, 12.9       | 19.9, 14.6, 8.64          | 12.7, 11.5, 9.18        | (0.63, 0.36)            | Ref 21    |
| DPO-2PPI             | (bt) <sub>2</sub><br>Ir(dipba) | 2.6             | 19.0, 17.3, 13.8       | 21.3, 15.8, 9.57          | 13.5, 12.0, 9.65        | (0.63, 0.36)            | Ref 21    |
| p-BPPI               | (bt) <sub>2</sub><br>Ir(dipba) | 2.4             | 20.1, --, 17.9         | 20.4, --, 14.1            | 13.5, --, 9.65          | (0.64, 0.36)            | Ref 22    |
| m-BPPI               | (bt) <sub>2</sub><br>Ir(dipba) | 2.5             | 19.8, --, 15.9         | 19.5, --, 10.7            | 12.6, --, 9.18          | (0.63, 0.37)            | Ref 22    |

<sup>a</sup> Current efficiency. <sup>b</sup> Power efficiency. <sup>c</sup> External quantum efficiency corresponding to the value at the maximum, 100 and 1000 cd m<sup>-2</sup>. <sup>d</sup> The CIE1931 coordinates of these OLEDs.
